# Supplementary material for: Optimizing GC-ICP-MS for ultra-trace quantification of PBDEs in natural water samples using species-specific isotope dilution
Source: Royal Society of Chemistry journal article supplement (doi:10.1039/c4ja00112e), 2014-06-26

**Supplementary Material**

**Manuscript JA-ART-2014-000112**

**Optimizing GC-ICP-MS for ultra-trace quantification of PBDEs in natural water samples  
using species-specific isotope dilution**

**Adriana Gonzalez-Gago, Daniel Pröfrock\* and Andreas Prange**

Helmholtz Zentrum Geesthacht - Zentrum für Material und Küstenforschung, Institute for  
Coastal Research, Department Marine Bioanalytical Chemistry

Max-Planck Str. 1, 21502 Geesthacht, Germany

\*Corresponding author: [daniel.proefrock@hzg.de](mailto:daniel.proefrock@hzg.de)

**Figure S1** Effect of (a) the extraction lens 1 (b) the deflection and (c) the plate bias voltage settings on the signal to noise ratio of the selected PBDE congeners when using GC-ICP-MS conditions. Calculations were based on the  $^{79}\text{Br}$  signal

(a)

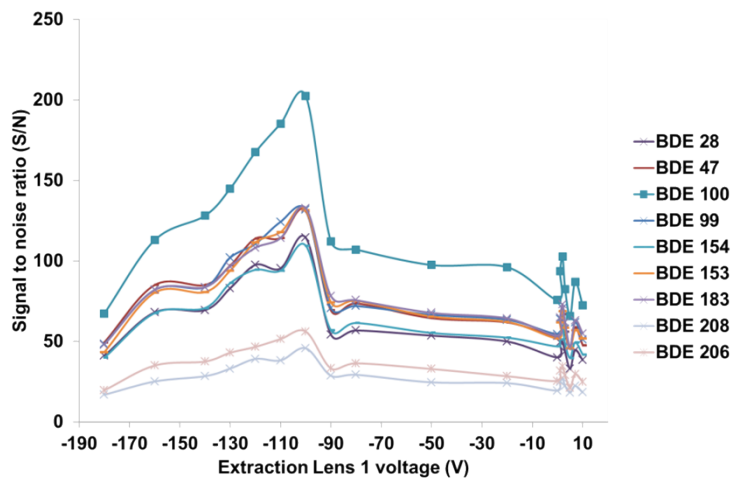

(b)

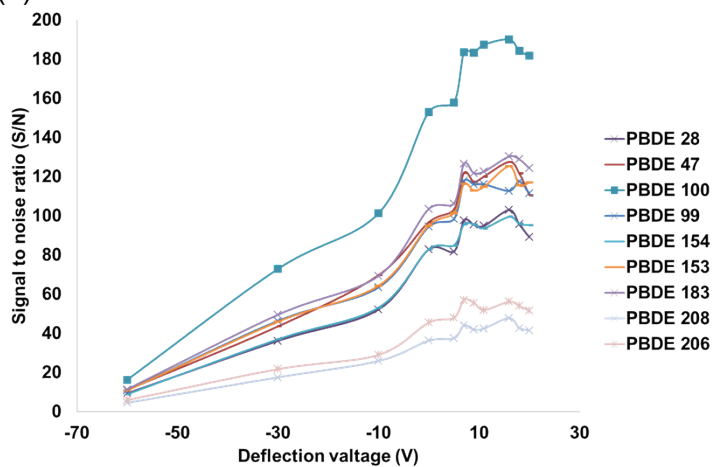

(c)

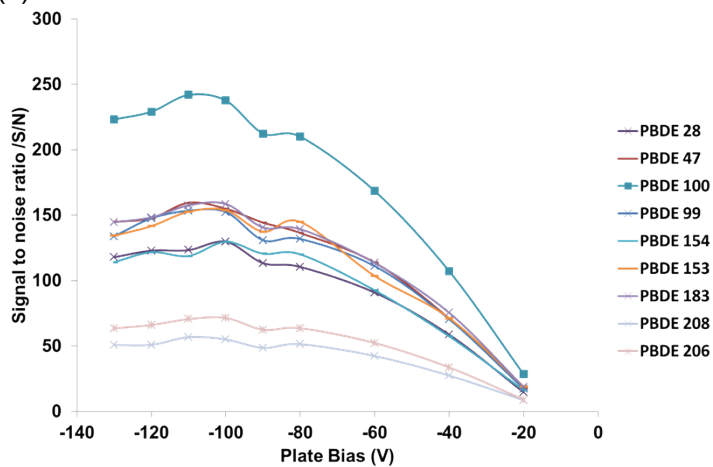

**Figure S2 (a)** Effect of the octopole bias voltage settings on the signal to noise ratio of the selected PBDE congeners when using GC-ICP-MS conditions. Calculations were based on the  $^{79}\text{Br}$  signal. The quadrupole bias was always set to a 2 V more positive voltage. **(b)** Effects of the He cell gas flow rate at an octopole/quadrupole bias setting of -16/-14 V respectively.

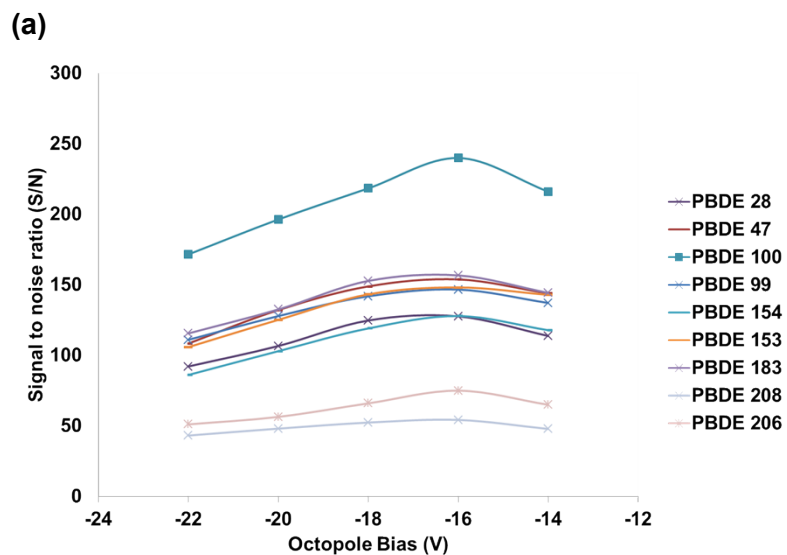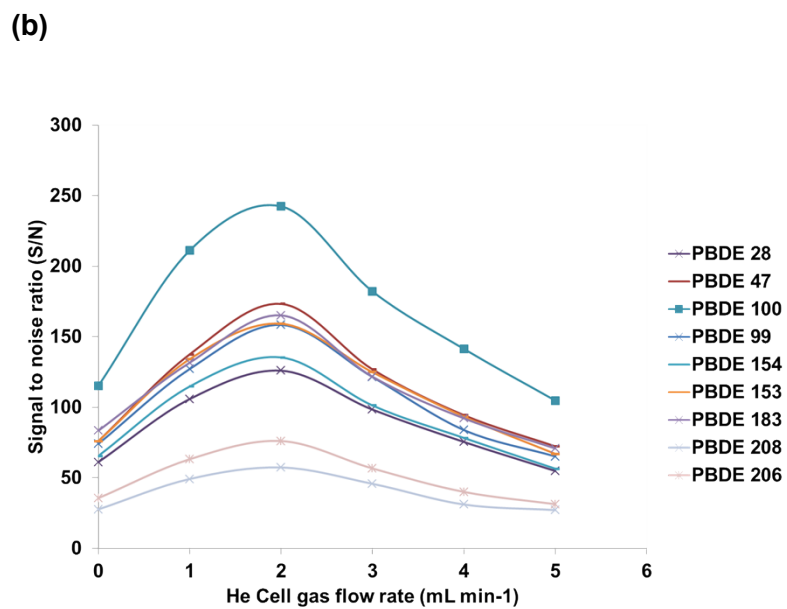

**Figure S3** Optimisation of the optional plasma gas flow for **(a)** Helium and **(b)** Nitrogen

**(a)**

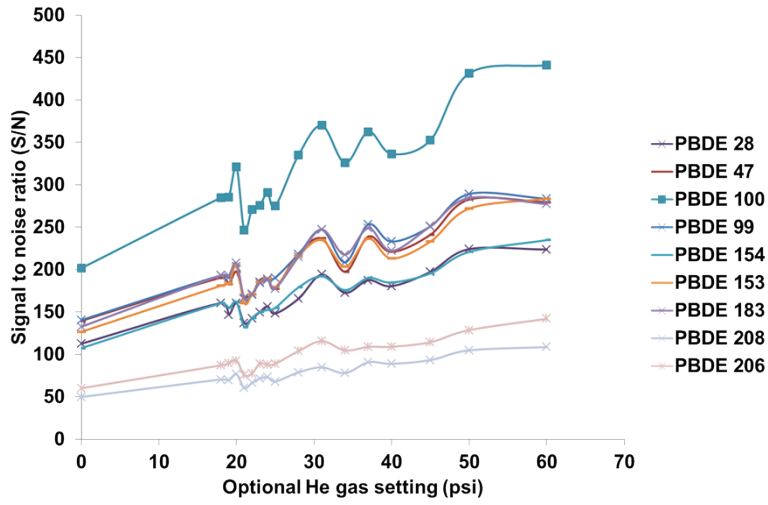

**(b)**

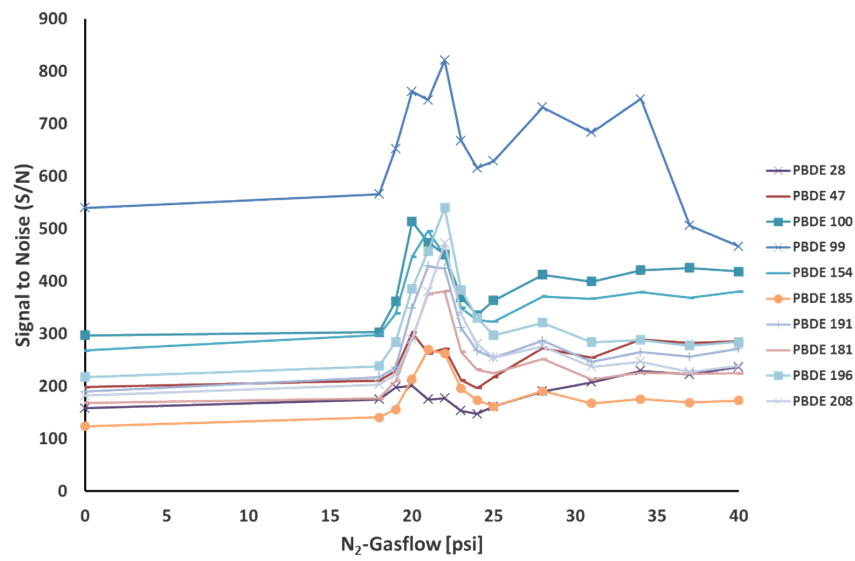

Supplement: c4ja00112e1.pdf [file c4ja00112e1.pdf]
